# Supplementary material for: Synthesis, characterization and catalytic epoxidation properties of a new tellurotungstate(iv)-supported rhenium carbonyl derivative
Source: Royal Society of Chemistry journal article supplement (doi:10.1039/c8dt04195d), 2018-12-06
Supplement: c8dt04195d1.pdf [file c8dt04195d1.pdf]

## Supporting information

### Synthesis, characterization and catalytic epoxidation property of a new tellurotungstate(IV)-supported rhenium carbonyl derivative

Jingkun Lu, Xinyi Ma, Baijie Xu, Peipei He, Pengtao Ma, Jingyang Niu\* and Jingping Wang\*

*Henan Key Laboratory of Polyoxometalate Chemistry, Institute of Molecular and Crystal Engineering, College of Chemistry and Chemical Engineering, Henan University, Kaifeng, Henan 475004 P.R. China*

E-mail address: [jyniu@henu.edu.cn](mailto:jyniu@henu.edu.cn), [jpwang@henu.edu.cn](mailto:jpwang@henu.edu.cn)

Fax: (+86)371-23886876.

### CONTENTS

Section 1 The bond valence sum calculations

Section 2 Selected bond lengths and angles

Section 3 Additional structural figures

Section 4 Additional measurements

Section 5 Catalytic properties

## Section 1 The bond valence sum calculations

**Table S1** The BVS calculations of Te and W atoms in polyoxoanion.

| <b>Atoms</b> | <b>BVS</b> | <b>Atoms</b> | <b>BVS</b> |
|--------------|------------|--------------|------------|
| W1           | 6.241      | W6           | 6.173      |
| W2           | 6.193      | W7           | 6.181      |
| W3           | 6.164      | W8           | 6.177      |
| W4           | 6.240      | W9           | 6.189      |
| W5           | 6.307      | W10          | 6.475      |
| Te1          | 3.964      |              |            |

**Table S2** The BVS calculations of all oxygen atoms in polyoxoanion.

| <b>Atoms</b> | <b>BVS</b> | <b>Atoms</b> | <b>BVS</b> |
|--------------|------------|--------------|------------|
| O1           | 1.841      | O20          | 2.013      |
| O2           | 1.841      | O21          | 1.989      |
| O3           | 1.995      | O22          | 2.268      |
| O4           | 1.835      | O23          | 2.066      |
| O5           | 1.762      | O24          | 1.962      |
| O6           | 2.272      | O25          | 2.196      |
| O7           | 1.849      | O26          | 2.347      |
| O8           | 1.741      | O27          | 1.918      |
| O9           | 1.715      | O28          | 1.975      |
| O10          | 1.969      | O29          | 2.033      |
| O11          | 2.000      | O30          | 2.009      |
| O12          | 2.051      | O31          | 1.899      |
| O13          | 1.991      | O32          | 2.180      |
| O14          | 2.147      | O33          | 1.851      |
| O15          | 1.982      | O34          | 2.043      |
| O16          | 1.871      | O35          | 1.416      |
| O17          | 2.134      | O36          | 1.867      |
| O18          | 2.051      | O37          | 1.610      |
| O19          | 1.944      | O38          | 1.987      |

## Section 2 Selected bond lengths and angles

**Table S3** Selected bond length (Å) and bond angle (°) of compound **1**

| <b>Bonds</b> | <b>Length(Å)</b> | <b>Bonds</b>       | <b>Angle(°)</b> |
|--------------|------------------|--------------------|-----------------|
| Re-C(1)      | 1.88(2)          | C(1)-Re-O(6)       | 93.1(8)         |
| Re-C(2)      | 1.86(2)          | C(1)-Re-O(16)      | 176.6(8)        |
| Re-C(3)      | 1.91(2)          | C(1)-Re-O(23)      | 101.5(8)        |
| Re-O(6)      | 2.144(14)        | O(6)-Re-O(16)      | 83.6(5)         |
| Re-O(16)     | 2.148(13)        | O(6)-Re-O(23)      | 83.4(6)         |
| Re-O(23)     | 2.163(14)        | O(16)-Re-<br>O(23) | 77.1(6)         |
| Te-O(14)     | 1.899(12)        | O(22)-Te-O(14)     | 90.7(6)         |
| Te-O(22)     | 1.859(13)        | O(22)-Te-O(32)     | 92.8(6)         |
| Te-O(32)     | 1.873(13)        | O(32)-Te-O(14)     | 93.9(5)         |
| C(1)-O(36)   | 1.15(3)          |                    |                 |
| C(2)-O(37)   | 1.18(3)          |                    |                 |
| C(3)-O(38)   | 1.13(3)          |                    |                 |

### Section 3 Additional structural figures

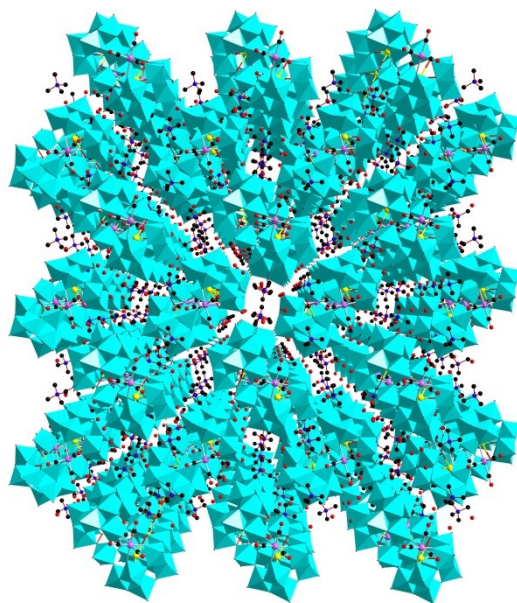

**Figure S1.** Packing diagram of **1** viewed along the a axis; Color code: Te, yellow; W, blue; Re, purple; C, black; O, red; WO<sub>6</sub>, cyan.

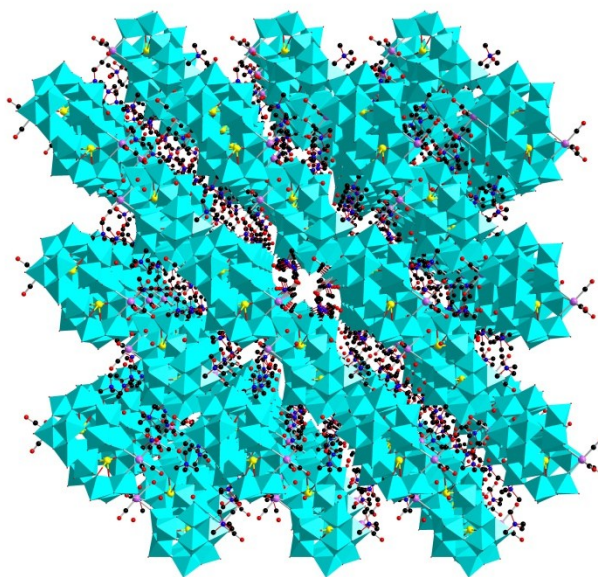

**Figure S2.** Packing diagram of **1** viewed along the b axis; Color code: Te, yellow; W, blue; Re, purple; C, black; O, red; WO<sub>6</sub>, cyan.

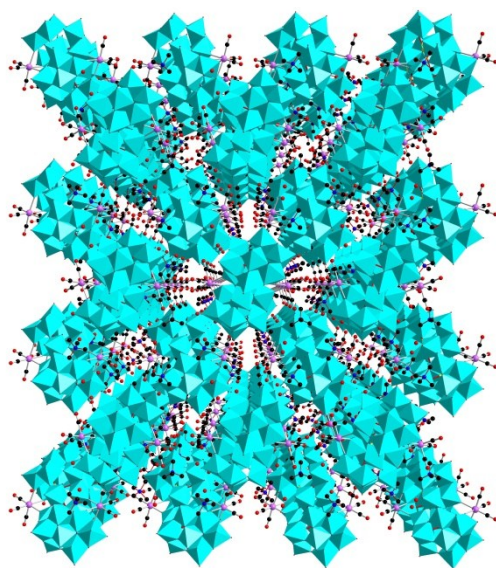

**Figure S3.** Packing diagram of **1** viewed along the *c* axis; Color code: Te, yellow; W, blue; Re, purple; C, black; O, red; WO<sub>6</sub>, cyan.

## Section 4 Additional measurements

### 4.1 IR Spectrum

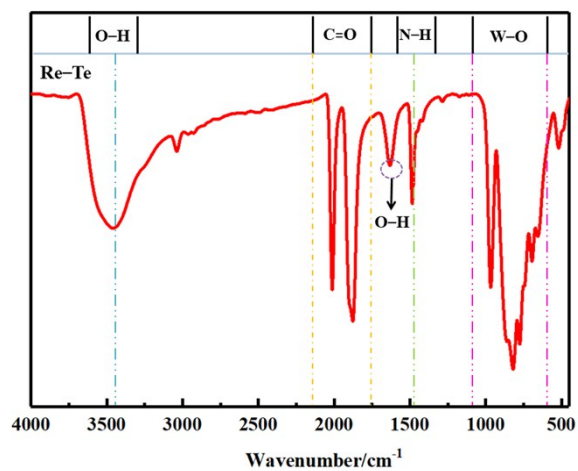

Figure S4. The IR spectrum of compound 1

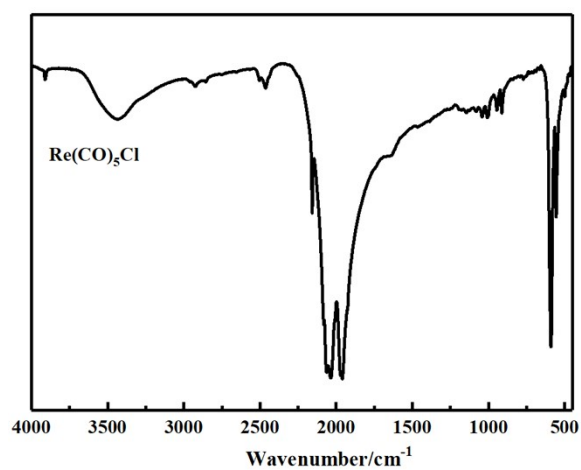

Figure S5. The IR spectrum of Re(CO)<sub>5</sub>Cl

### 4.2 X-ray powder patterns

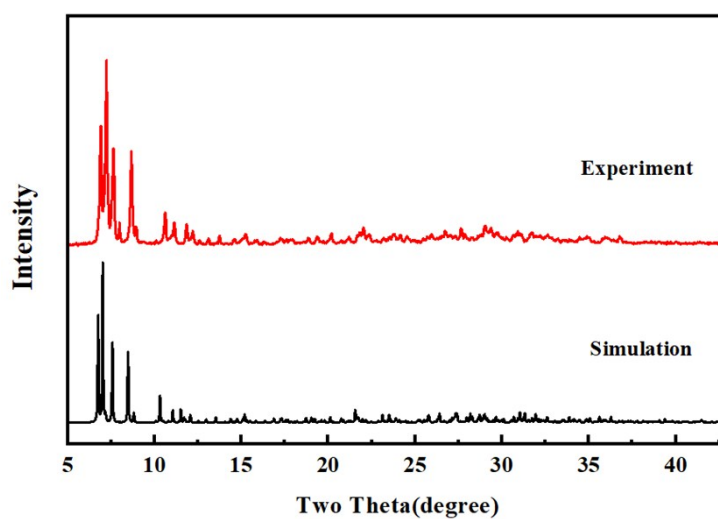

Fig. S6 The XPRD patterns for experiment (top) and simulated (bottom) of 1.

### 4.3 Thermogravimetric analysis

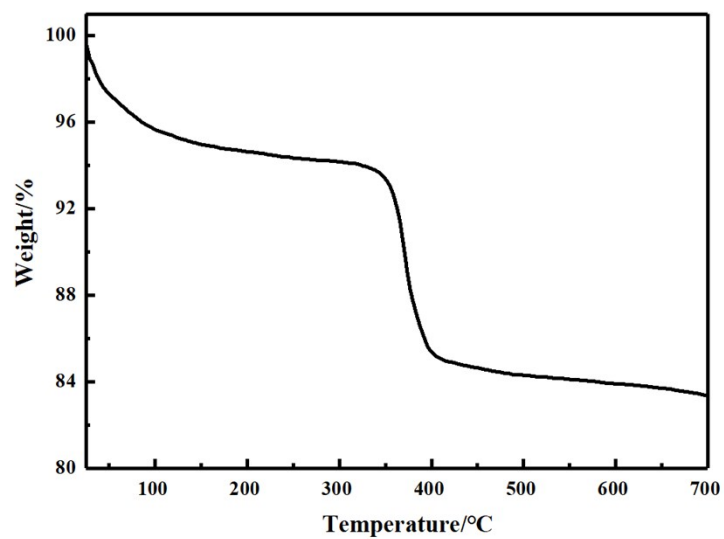

**Fig. S7** Thermogravimetric curve of **1**.

### 4.4 UV-vis spectrum

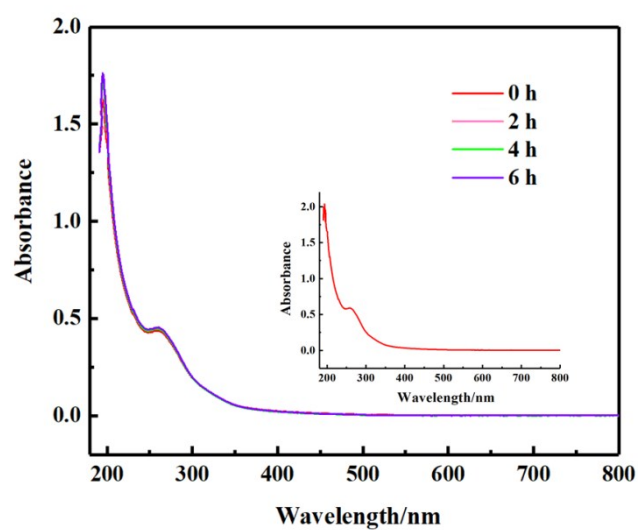

**Figure S8.** The UV-vis spectrum of **1** ( $5 \times 10^{-5} \text{ mol}\cdot\text{L}^{-1}$ )

## Section 5 Catalytic properties

**Table S4** Oxidation of cis-cyclooctene with different catalysts <sup>a</sup>

| Entry | Substrate                                                                         | Catalyst                                                                                                                           | Con. <sup>b</sup><br>(%) <sup>c</sup> | Sel. (%) |
|-------|-----------------------------------------------------------------------------------|------------------------------------------------------------------------------------------------------------------------------------|---------------------------------------|----------|
| 1     |                                                                                   | –                                                                                                                                  | 2.9                                   | >99      |
| 2     |                                                                                   | Re(CO) <sub>5</sub> Cl                                                                                                             | 3.4                                   | >99      |
| 3     |  | Na <sub>2</sub> WO <sub>4</sub> ·2H <sub>2</sub> O                                                                                 | 3.2                                   | >99      |
| 4     |                                                                                   | Na <sub>2</sub> TeO <sub>3</sub>                                                                                                   | 5.0                                   | >99      |
| 5     |                                                                                   | Catalyst <b>1</b>                                                                                                                  | 98.2                                  | >99      |
| 6     |                                                                                   | (NH <sub>4</sub> ) <sub>8</sub> {[Te <sub>2</sub> Mo <sub>12</sub> (OH)O <sub>44</sub> ][Re(CO) <sub>3</sub> ]}·13H <sub>2</sub> O | 6.3                                   | >99      |

<sup>a</sup> Reaction conditions: substrate (1 mmol), catalyst **1** (0.5 mol%), and H<sub>2</sub>O<sub>2</sub> (3.0 mmol) were mixed in 5 mL acetonitrile at 75 °C. Unless otherwise noted. <sup>b</sup> Determined by GC analyses based on initial substrate.

We have checked the rate of H<sub>2</sub>O<sub>2</sub> decomposition in the presence of catalyst without any organic substrate. The concentration of the H<sub>2</sub>O<sub>2</sub> solution was determined by volumetric titration using a standard solution of potassium permanganate (0.1 M). The ln(C<sub>t</sub>/C<sub>0</sub>) values are plotted against the reaction time in Fig. 5. C<sub>0</sub> and C<sub>t</sub> are the initial H<sub>2</sub>O<sub>2</sub> concentration and the H<sub>2</sub>O<sub>2</sub> concentration at time t, respectively. The linear fit of the data reveals that the decomposition process follows pseudo-first-order kinetics for the H<sub>2</sub>O<sub>2</sub> decomposition (R<sup>2</sup> = 0.998). By using Equations (1) (–dC<sub>t</sub>/d<sub>t</sub> = kC<sub>t</sub>) and (2) (ln C<sub>0</sub>/C<sub>t</sub> = kt), the observed rate constant k for the H<sub>2</sub>O<sub>2</sub> decomposition was determined to be –0.016 min<sup>–1</sup>.

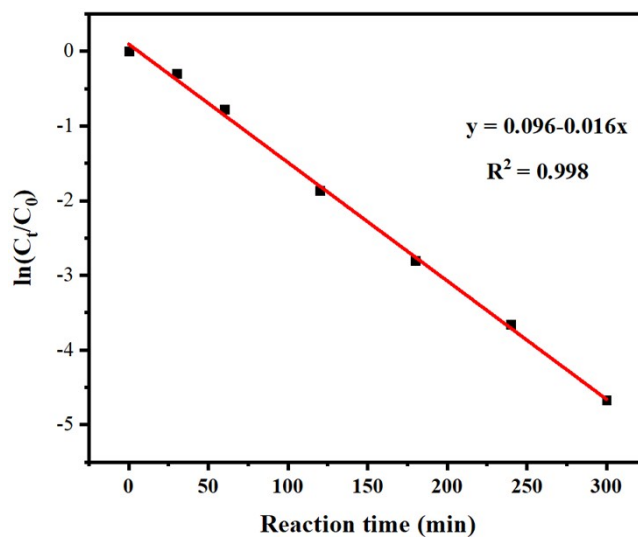

**Figure S9.** Kinetic profiles of the H<sub>2</sub>O<sub>2</sub> decomposition reaction.



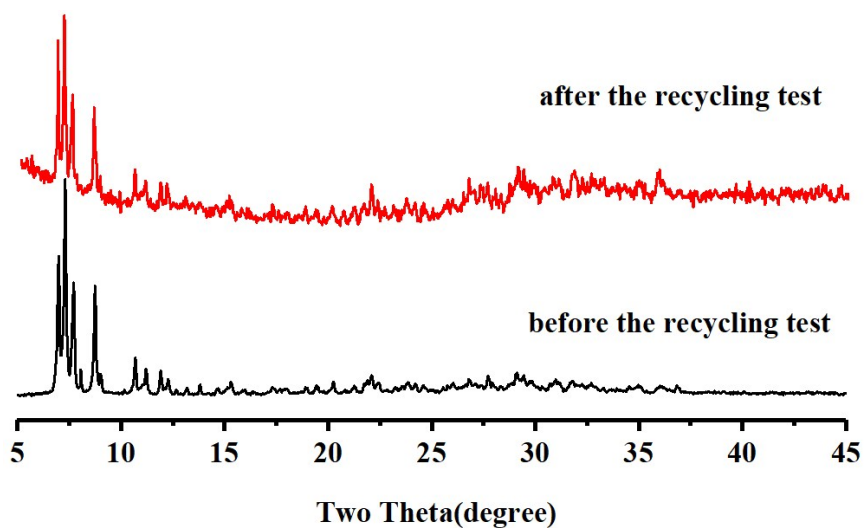

**Figure S10.** The XRPD of **1** before and after the recycling tests

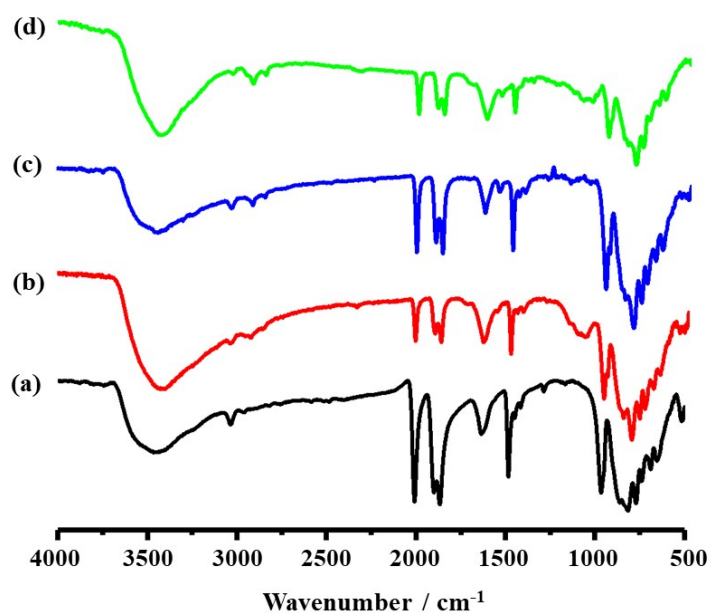

**Figure S11.** IR spectra of catalyst **1** before and after the recycling tests; (a) IR spectrum of catalyst **1**; (b) IR spectrum of the sample tested 1st run; (c) IR spectrum of the sample tested 2nd run; (d) IR spectrum of the sample tested 3rd run.

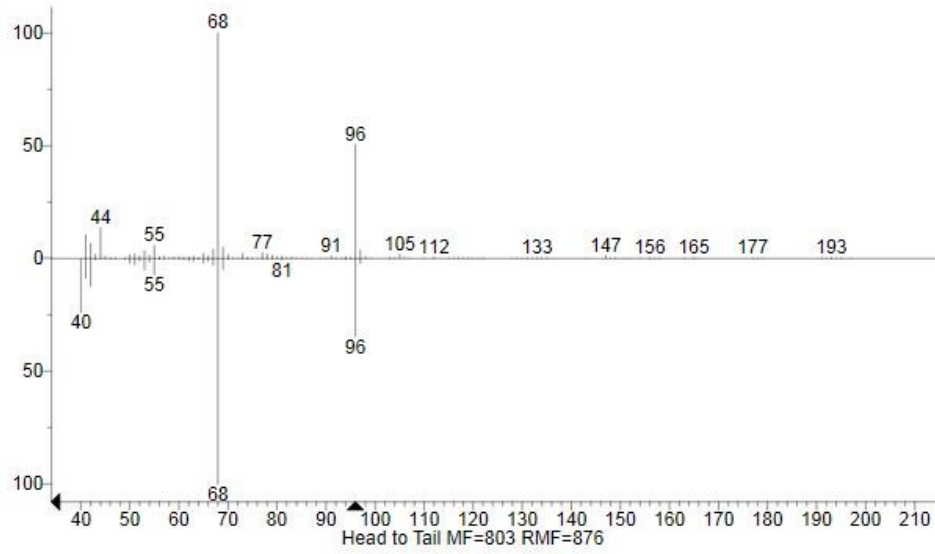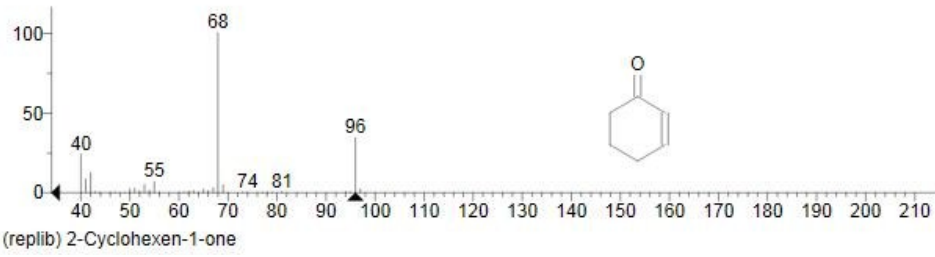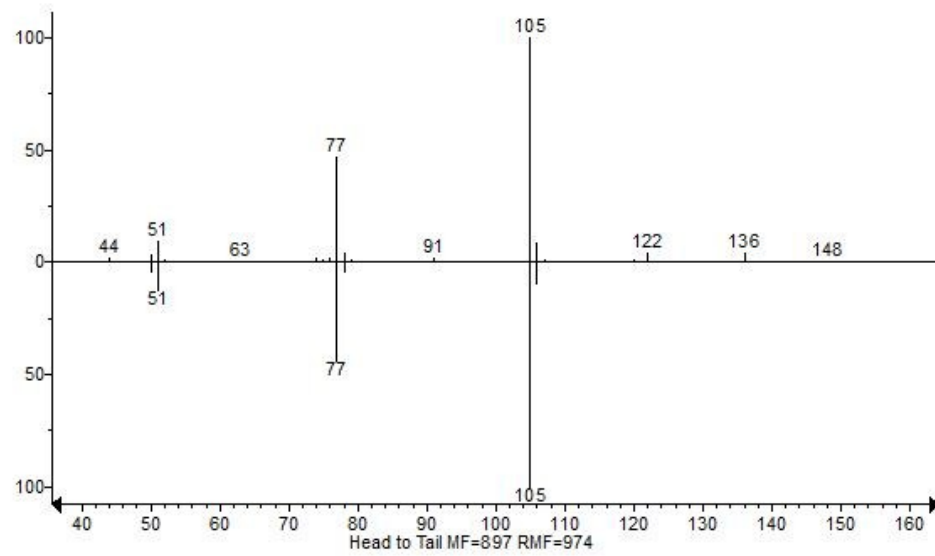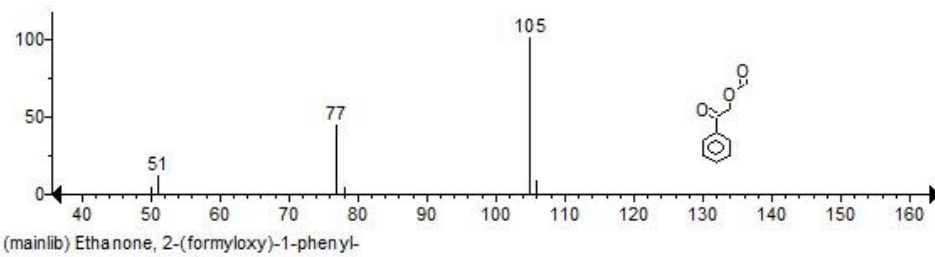

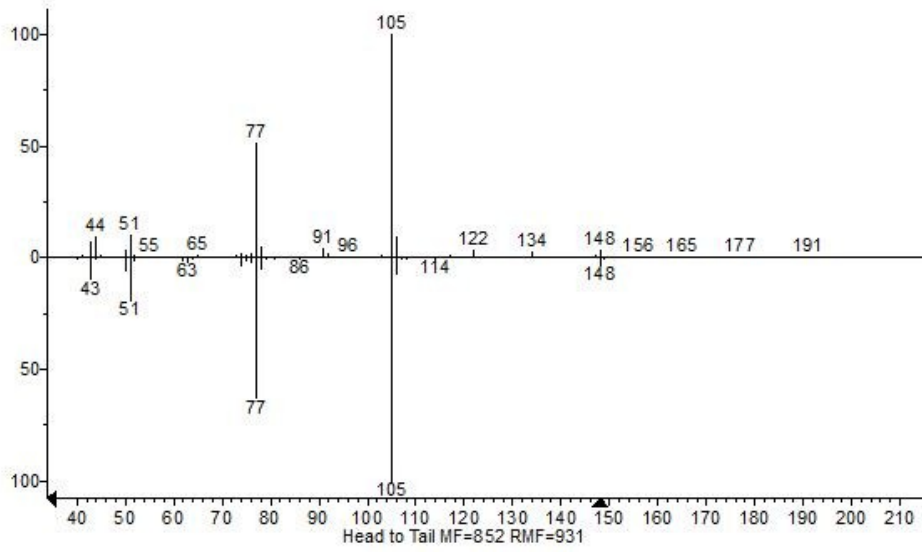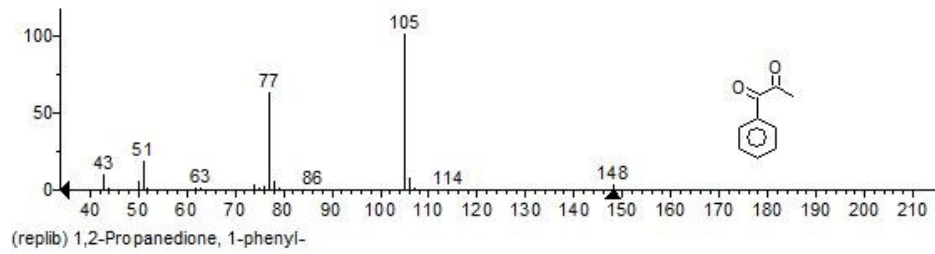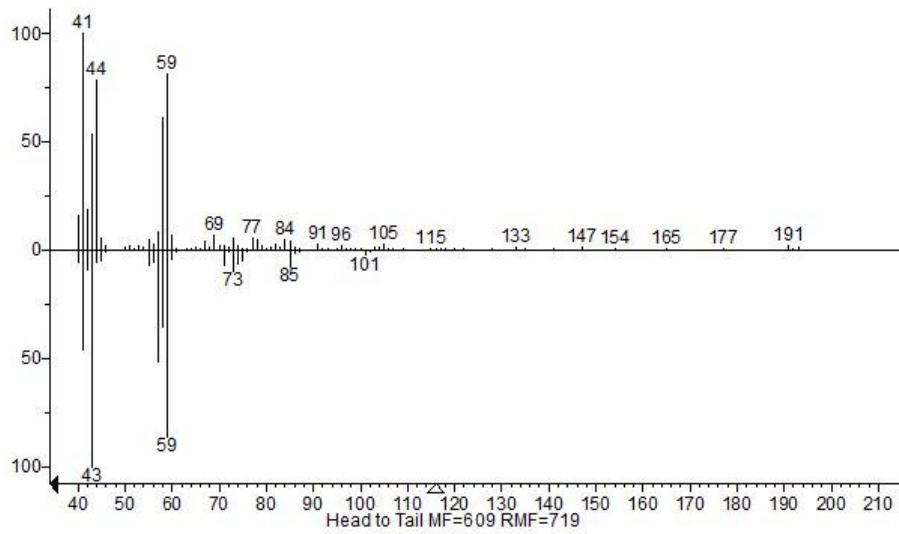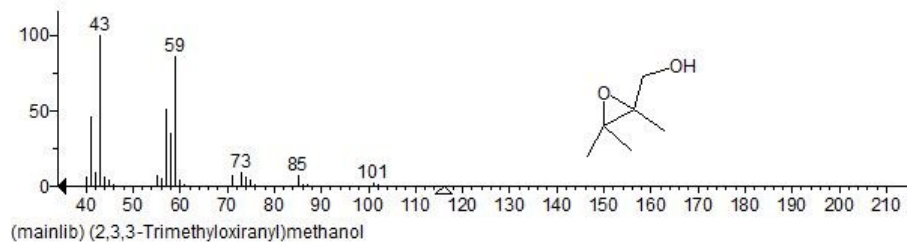

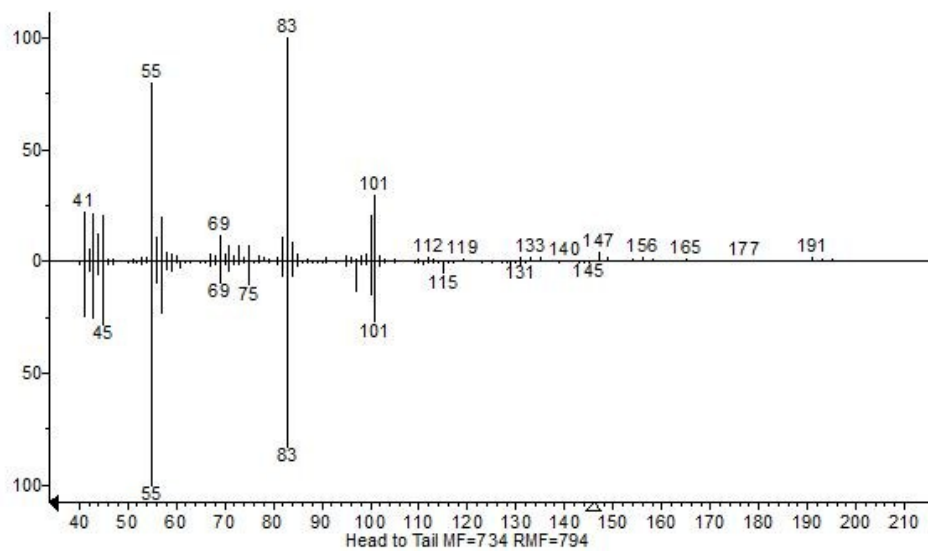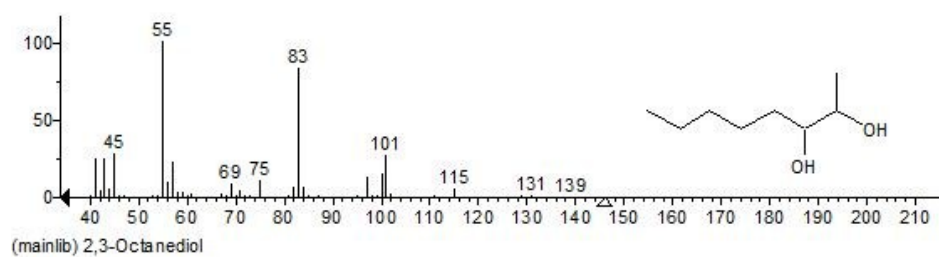

**Figure S12.** Mass spectra of the side products of entries 2, 4, 7, 8 and 10 in Table 4
